# Supplementary material for: Impacts of environmental and socio-economic factors on emergence and epidemic potential of Ebola in Africa
Source: PubMed Central journal article supplement (PMC6794280; doi:10.1038/s41467-019-12499-6), 2019-10-15
Supplement: 41467_2019_12499_MOESM1_ESM.pdf [file 41467_2019_12499_MOESM1_ESM.pdf]

1 **Supplementary Methods**

2 EMM compartmental transition algorithm.

3 For each time step  $t$ , the number of individuals moving through disease compartments both  
 4 within and between grid cells (see Fig. 2) was estimated using disease transmission parameters. We  
 5 predicted the likely movement between disease compartments per time step, by drawing randomly  
 6 from a binomial distribution. We describe this process below, using as an example the movement of  
 7 individuals moving from Exposed to Infectious compartments within grid cells.

8

- 9 1. We determined the probability that a number of individuals were likely to move from the Exposed  
 10 to Infectious compartments as:

11

$$12 \quad p(k_i \text{ infections within } E_t) = \binom{E_t}{k_i} \alpha_t^{k_i} (1 - \alpha_t)^{E_t - k_i} \quad (\text{Equation 1})$$

13

14 where  $k_i$  represents the number of individuals that enter the Infectious compartment,  $E_t$  the  
 15 number of Exposed individuals at time  $t$ , and  $\alpha_t$  the transition probability at time  $t$ .

- 16 2. Using Equation 1, we determined for any value of  $k_i$  the probability of  $k_i$  individuals that move  
 17 into the Infectious compartment, i.e., we computed the probability of the number of people,  
 18 between 0 and the total number of individuals in the Exposed compartment, entering the  
 19 Infectious compartment at time step  $t$ . We then drew randomly from this probability distribution  
 20 to choose  $k_i$  individuals that moved into the Infectious compartment, thereby weighting the choice  
 21 towards the more likely outcomes given  $\alpha$ .
- 22 3. Once the number of people that will be infected in the next time step  $k_i$  was determined, then  $k_i$   
 23 individuals were removed from the Exposed compartment and added to the Infectious  
 24 compartment.
- 25 4. This process continued (per time step) until the number of individuals in the Exposed  
 26 compartment equalled zero.

27

28 The same process was applied to every compartment change using the respective transition  
 29 probabilities (i.e., substituting  $\alpha$  in the above example). Movement of individuals between respective  
 30 Exposed and Infectious compartments between grid cells was also modelled similarly, but stopping  
 31 movements if the exposed or infectious number dropped to zero but with no change to susceptible  
 32 numbers. Due to the high morbidity from this disease, individuals in the Infectious compartment were  
 33 deemed less likely to travel and were awarded a travel probability that was half of the expected rate  
 34 for non-symptomatic individuals.

35

36

37 Force of zoonotic infection,  $\lambda_z$  algorithms.

38 The force of infection for zoonotic host to human transmission,  $\lambda_z$  was estimated per grid cell,  
39 per time step  $t$ , as follows:

$$\lambda z_t = \kappa H \quad (\text{Equation 2})$$

40

41 where  $\kappa$  = spill-over risk, and  $H$  = probability of zoonotic host presence per grid cell. Spill-over event  
42 probability,  $\kappa$  per person, per time step is given by:

43

$$\kappa = \left( \frac{O}{S_h T} \right) \quad (\text{Equation 3})$$

44

45 where  $O$  = number of historic outbreaks,  $S_h$  = number of historically susceptible individuals and  $T$  =  
46 total time when infections could have occurred. Note: Above we are estimating the probability of an  
47 individual being involved in a spill-over event directly from an animal host, which is distinct from the  
48 overall risk of contracting the disease.  
49

50

51 Force of infection,  $\lambda$  algorithms.

52 The force of infection for human-to-human transmission, per grid cell and per time step  $t$ , was  
53 estimated as:

$$\lambda_t = \beta I_t + \beta F_t \quad (\text{Equation 4})$$

54

55 where  $\beta$  = effective contact rate,  $I_t$  = number of individuals in Infectious compartment at time step  $t$ ,  
56 and  $F_t$  = number of individuals in Funeral compartment at time step  $t$ . For simplicity we assumed that  
57  $\beta I$  and  $\beta F$  were the same (hereafter referred to as  $\beta$ ). When  $t = 0$ ,  $\beta$  is given by:

58

$$\beta = m * \left( \frac{R_0}{ND} \right) \quad (\text{Equation 5})$$

59

60 where  $R_0$  = basic reproduction number,  $m$  = mobility,  $N$  = population size per time step, and  $D$  =  
61 duration in days that an individual is infectious. In this context,  $m$  was used to modify the ideal free  
62 gas model of human movement with distances travelled which are spatially variable across the  
63 landscape. We calculated a two-dimensional collision frequency  $c$ , per person per grid cell (1) as  
64 follows:  
65

66

$$c = nv\Delta tq^2 \quad (\text{Equation 6})$$

67

68 where  $n$  = number of individuals,  $v$  = walking velocity,  $\Delta t$  = time period and  $q$  = interaction sphere  
69 radius. In the context of our simulation,  $v\Delta t$  represents daily walking distance. Then we defined  $m$  as

70 the inverse deviation from a mean of  $c$  such that areas with more movement have a higher effective  
 71 contact rate. However, when  $t > 0$  we redefined  $\beta$  as follows:

72

$$73 \quad \beta = m * \left( \frac{R_e}{ND} \right) \quad \text{(Equation 7)}$$

74

75 where  $R_e$  = effective reproduction number,  $m$  = mobility,  $N$  = population size per time step, and  $D$  =  
 76 duration in days that an individual is infectious.  $R_e$  is related to  $R_0$  but due to changes in human  
 77 behaviour and health care responses,  $R_e$  may be lower and decline over time, in addition to the  
 78 implicit reduction in  $R$  as the pool of susceptibles decreases during an outbreak. We assume that the  
 79 effective reproduction number reduces on a daily basis due to increasingly strong health care  
 80 responses over time.

81 So initially, when  $t = 1$ :

$$R_e = aR_0 \quad \text{(Equation 8)}$$

82

83 where  $R_e$  = effective reproduction number at  $t = 1$ ,  $a$  = decay rate, and  $R_0$  = basic reproduction  
 84 number. However, when  $t > 1$ :

85

$$R_e^{t+1} = aR_e^t \quad \text{(Equation 9)}$$

86

87 where  $R_e^t$  = effective reproduction number at time  $t$ , and  $a$  = decay rate. We define decay rate  $a$  per  
 88 grid cell, from the empirical relationship between wealth and health outcomes. Using either direct or  
 89 derived empirical estimates of the gradient of the change in  $R_e$  over time from (3, 4, 5, 6), we fitted an  
 90 exponential decay curve between estimates of per capita Gross Domestic Product measured as  
 91 Purchasing Power Parity (from 2) and the gradient of  $R_e$  change per day. The starting  $R_e$  decay value  $a$   
 92 per grid cell, was given by:

93

$$a = 1.024 x \text{GDP}^{-w2} \quad \text{(Equation 10)}$$

94

95 where the best estimate for exponent  $w2$  was  $-0.848$ ,  $\text{GDP}$  = Gross Domestic Product from (7),  
 96 pseudo  $r^2 = 0.76$ , and  $n = 8$ .

97

98 The poverty-weighted Case Fatality Rate (wCFR) per grid cell, was given by:

99

$$\text{wCFR} = 0.21 \ln\left(\frac{1}{\text{GDP}}\right)^{-w1} \quad \text{(Equation 11)}$$

100 where the best estimate for exponent  $w_1$  was -0.0239, GDP = Gross Domestic Product from (7),  
101 pseudo  $r^2 = 0.9081$ , and  $n = 20$ .

102

103

104 **Supplementary Figures**

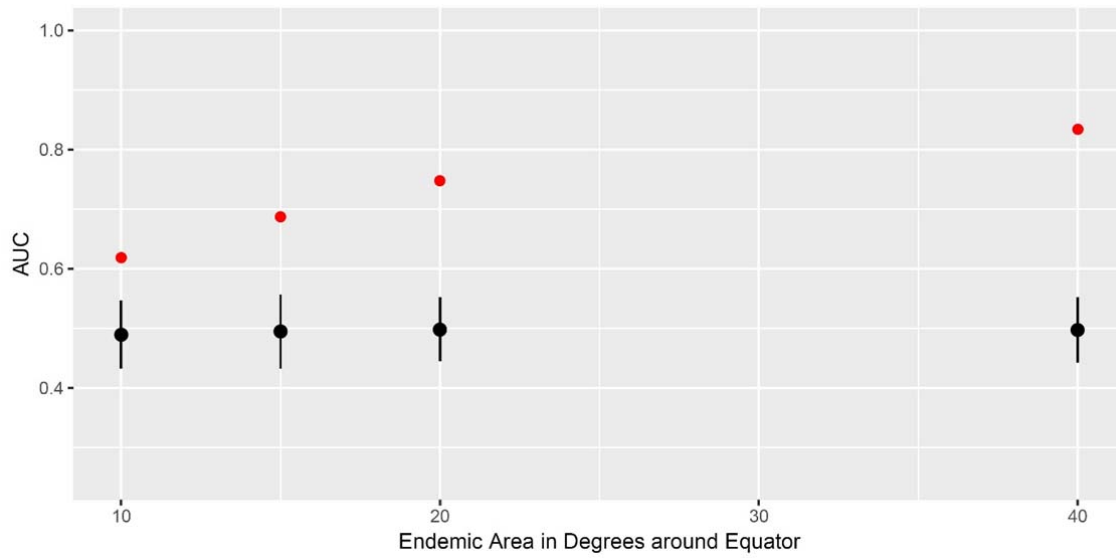

105

106 **Supplementary Figure 1. Comparison of AUC scores for predicted risk versus observed risk of**  
107 **known Ebola outbreaks.** Black dots represent four different lots of ten thousand randomisations of  
108 the risk surface, whiskers 95% confidence intervals, while red dots are AUC values on the raw  
109 predictive surface. The x-axis represents the predicted size of the endemic areas with randomisations  
110 of the risk surface happening 10-40 degrees around the equator.

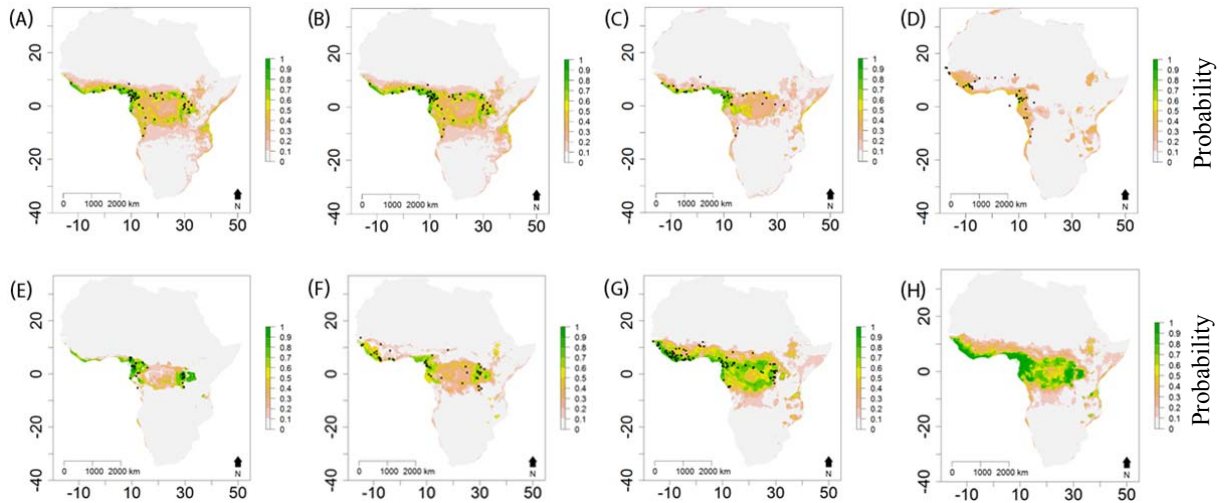

111  
112

113 **Supplementary Figure 2. Present-day host occurrence probability.** Maps represent occurrence  
 114 probability  $H$  of EBOV host and other infection source species estimated from boosted-regression  
 115 trees (BRT) models. Probability of species occurrence per grid cell ( $0.0416^\circ$ ) is represented on a  
 116 linear color scale where green is most suitable ( $p(H) = 1$ ) and white unsuitable ( $p(H) = 0$ ) where (A)  
 117 *Epomophorus gambianus gambianus*; (B) *Epomops franqueti*; (C) *Hypsignathus monstrosus*; (D)  
 118 *Rousettus aegyptiacus*; (E) *Gorilla spp.*; (F) *Pan spp.*; (G) *Cephalophus spp.*; and (H) all species  
 119 combined. Axis labels indicate degrees in a World Geodetic System 84 projection. Filled black circles  
 120 represent GBIF (8) occurrence records.

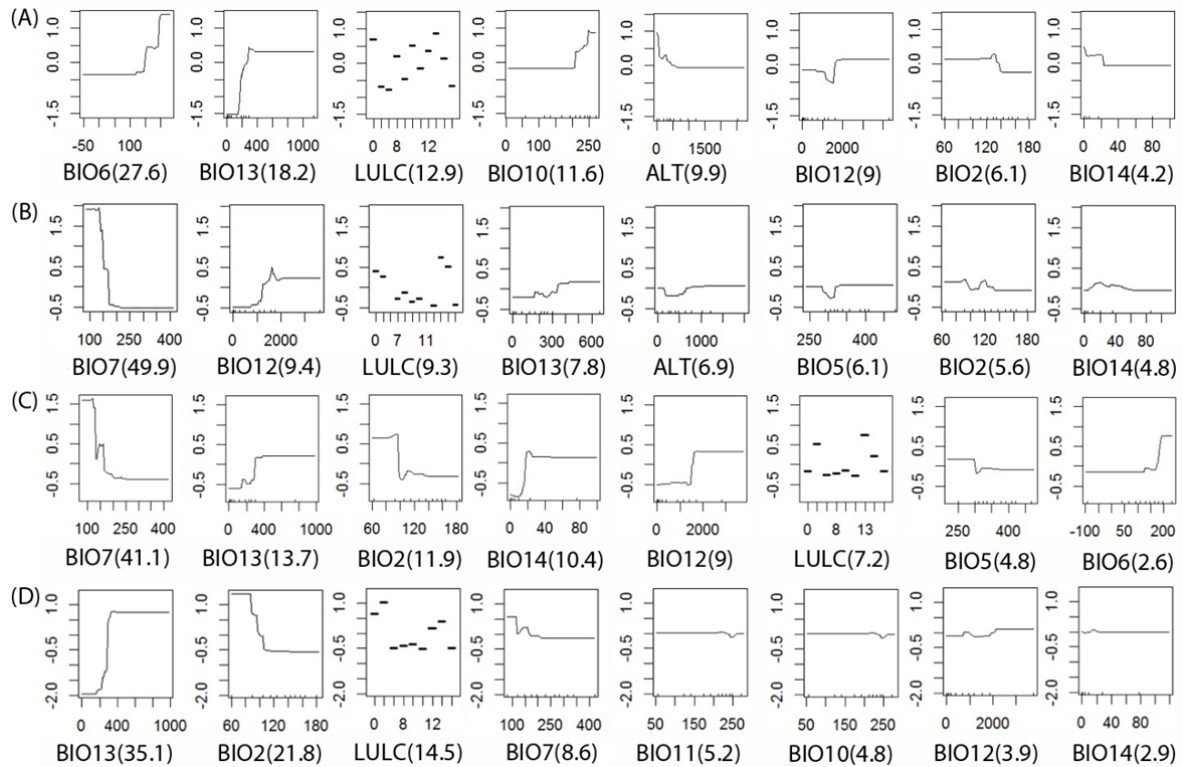

121  
122

123 **Supplementary Figure 3. Response curves from boosted-regression trees (BRT) models of**  
 124 **EBOV host species occurrences.** Each plot represents the shape of the normalized fitted functions  
 125 for each variable where (A) *Epomophorus gambianus gambianus*; (B) *Epomops franqueti*; (C)  
 126 *Hypsignathus monstrosus*; and (D) *Rousettus aegyptiacus*. The relative percentage contribution of  
 127 each variable to the model in terms of variance explained is given in parenthesis, where only the top  
 128 eight variables of the model are included for each species. Variable abbreviations are defined in  
 129 Supplementary Table 2.

130

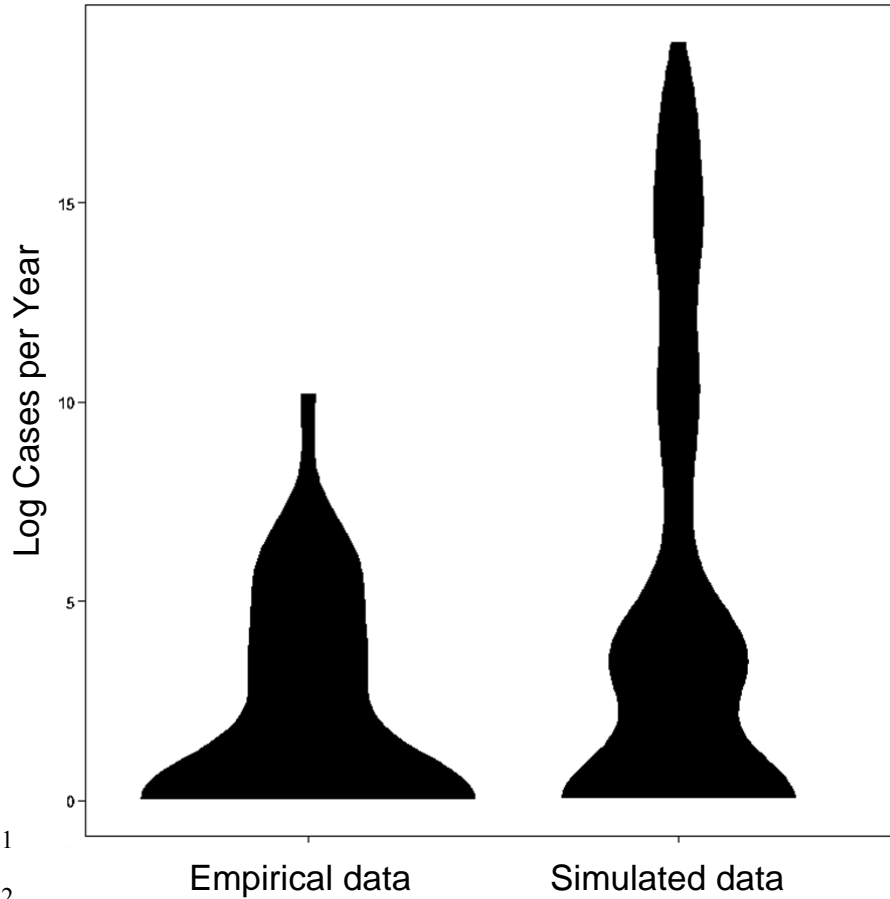

131

132

133 **Supplementary Figure 4. Distributions of relative frequency of EBOV cases per year.** Violin  
134 plots represent the empirical observed (n=23 outbreaks) data of log total number of cases per year  
135 from 1967-2016 (9), and log total number of cases per year (n=2500 runs) from EMM simulations for  
136 present day environmental and demographic conditions.

137



138

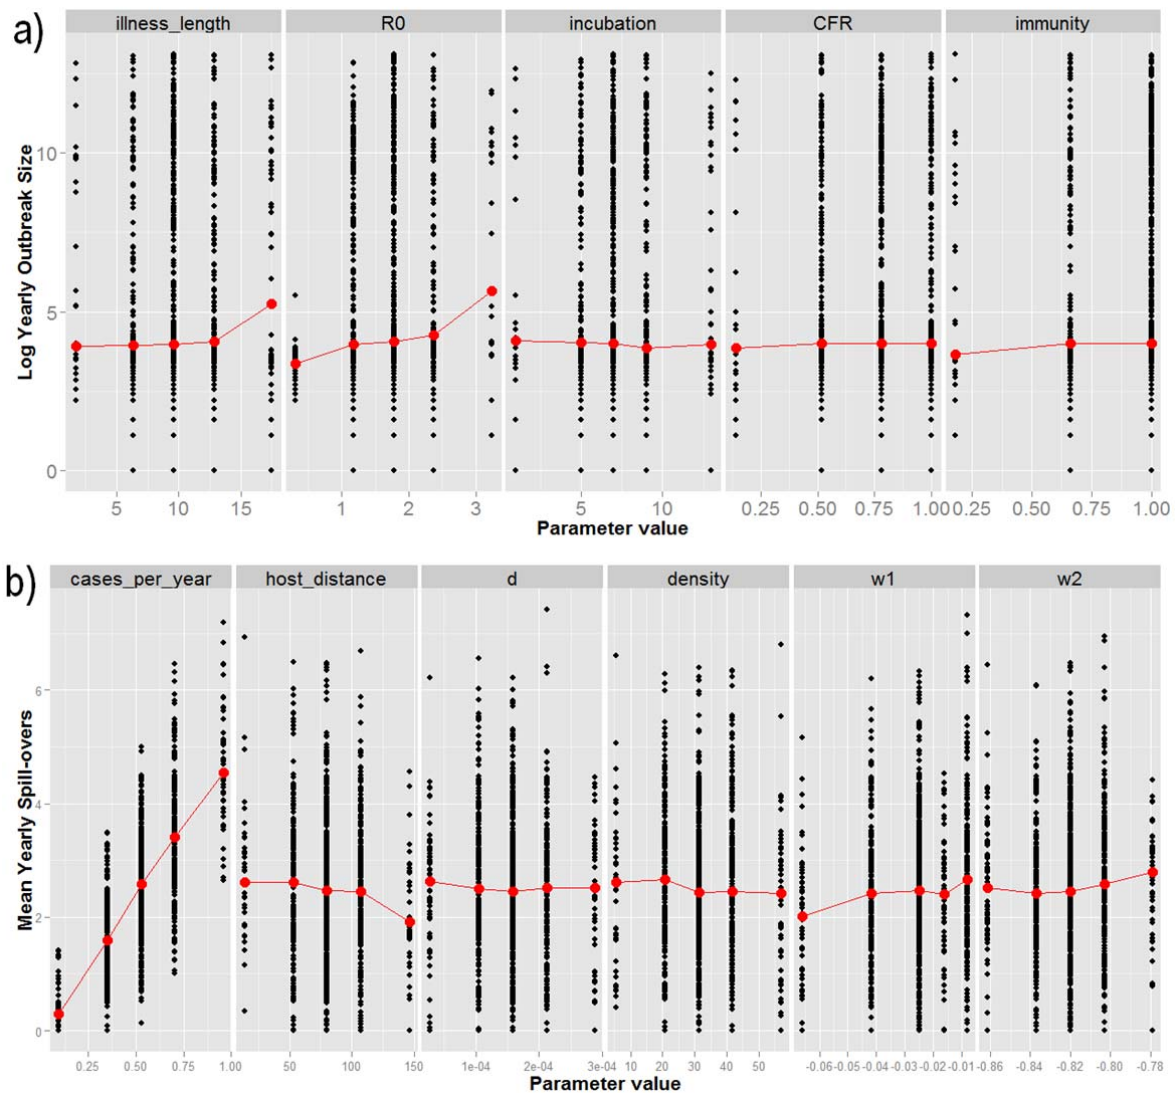

139

140

141

142

143

144

145

146

147

148

149

150

151

152

**Supplementary Figure 5. Sensitivity plots of input parameters for (a) total number of annual log EVD cases, and (b) mean annual spill-overs.** Black dots show the response values per simulation and are jittered for greater clarity. Red dots represent the median values for each parameter value, and red lines join the medians to aid interpretation of any trend. Parameters are as follows: illness length - mean number of days in the infectious compartment;  $R_0$  – basic reproductive number; incubation - mean number of days in the exposed compartment; CFR - mean case fatality rate per illness; immunity - mean immunity to re-infection where 1 is totally immune; cases per year - mean spill-over rate constant; host distance - mean daily distance (m) travelled by host reservoir species; density - mean number of reservoir host individuals per grid cell; w2 - shape of the effective reproductive number ( $R_e$ ) decay curve, where low values represent a less curved, more linear negative relationship; and w1 - shape of the CFR~poverty curve, where lower values represent a less curved, more linear negative relationship.

153

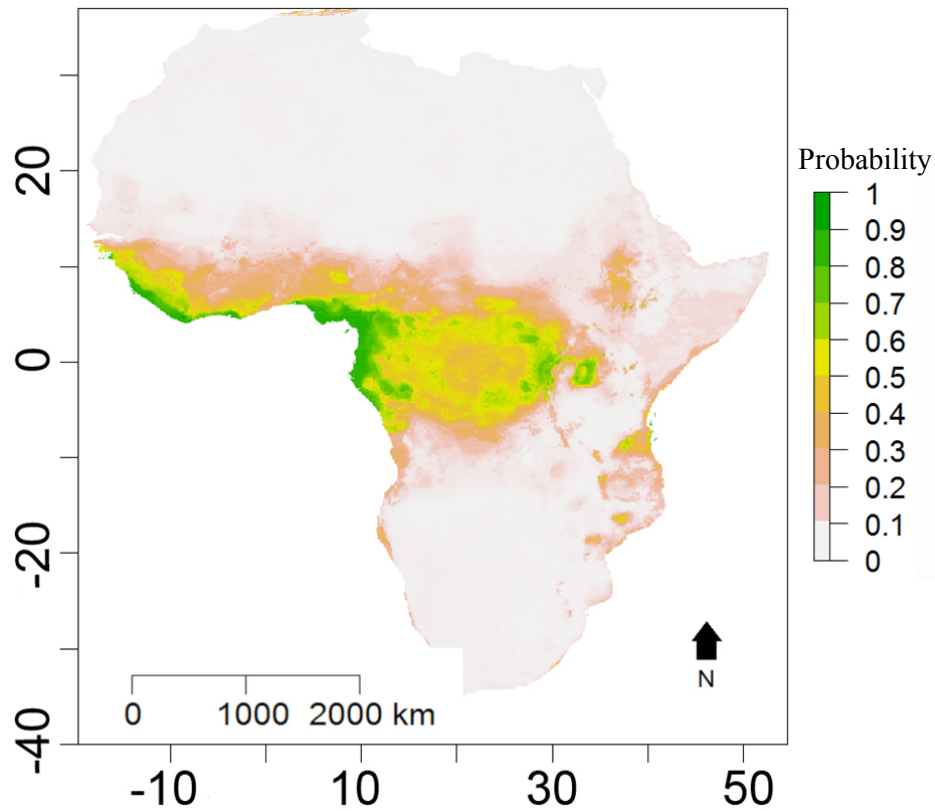

154  
155  
156  
157  
158  
159  
160  
161  
162  
163  
164

**Supplementary Figure 6. Future host occurrence probability.** Maps represents  $H_{2070}$  of EBOV host and other infection source species estimated from boosted-regression trees (BRT) models under the medium outlook RCP6 scenario. Probability of species occurrence per grid cell ( $0.0416^\circ$ ) is represented on a linear colour scale where green is most suitable ( $p(H) = 1$ ) and white unsuitable ( $p(H) = 0$ ) for all species combined. Axis labels indicate degrees in a World Geodetic System 84 projection.

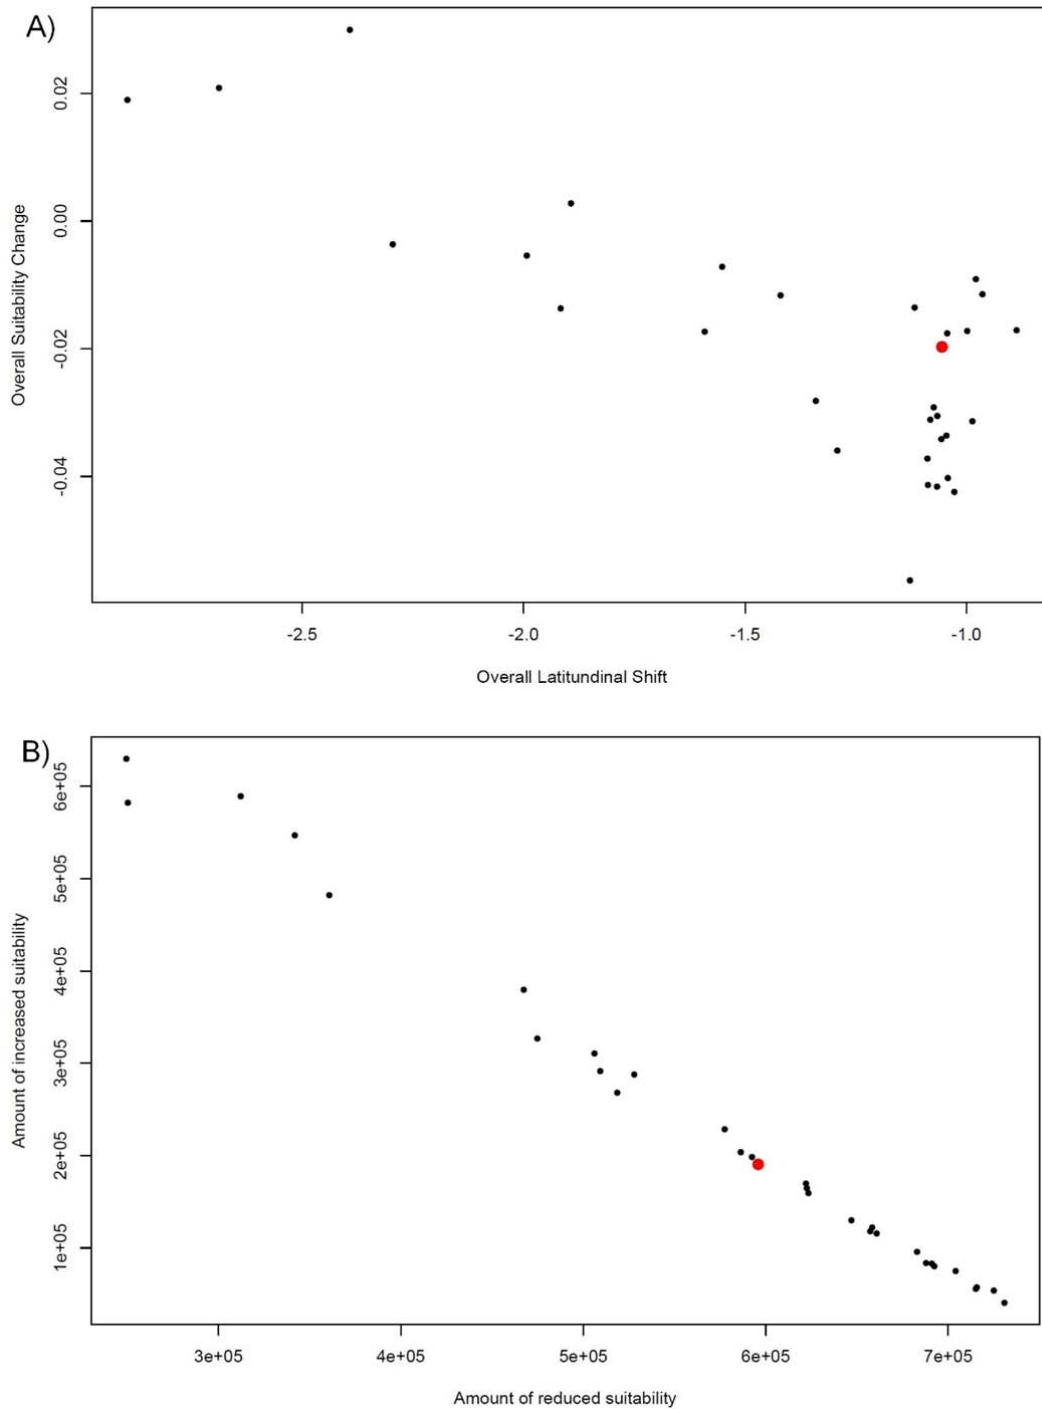

165  
 166 **Supplementary Figure 7. Relative changes from present day to 2070 from host suitability grids**  
 167 **using 32 different climate models.** The host + non-host surfaces (see methods) were recreated using  
 168 the same methods as for the present study but for all available climate models (n=32), with the climate  
 169 model (HadGem2-AO) used in the present study highlighted in red. For panel (A) the points represent  
 170 the mean change per grid cell in suitability from present day to 2070 versus the mean shift in non-zero  
 171 points. For panel B the comparison is the number of grid cells that increase in value versus those that  
 172 decrease in value.

173

174 **Supplementary Tables**

175 **Supplementary Table 1. Seroprevalence of EBOV in reservoir host species.** Species assignments  
 176 followed the taxonomy in (10). Prevalence was measured as the proportion of positive results per  
 177 sample and raw prevalence data was transformed to a rank within each study. Direct prevalence  
 178 comparisons were not possible due to methodological differences. We estimated the most important  
 179 EBOV host species as those that appear as the top two ranks in all sources. We identified four  
 180 candidate bat species hosts: *Epomops franqueti*, *Epomophorus gambianus gambianus*, *Hypsignathus*  
 181 *monstrosus*, and *Rousettus aegyptiacus*. N represents sample size; Hipp Hipposideridae; Molo  
 182 Molossidae; Ptero Pteropodidae; CI Côte d'Ivoire; SL Sierra Leone; LR Liberia; GH Ghana; CG  
 183 Congo; and GA Gabon.

184

| Family | Species                                | Country        | N   | Prevalence | Rank | Source |
|--------|----------------------------------------|----------------|-----|------------|------|--------|
| Hipp   | <i>Hipposideros sp.</i>                | CG, SL, LR     | 98  | 0.04       | 4    | (11)   |
| Molo   | <i>Mops condylurus</i>                 | CI, SL, LR, CG | 37  | 0.05       | 4    | (11)   |
| Ptero  | <i>Eidolon helvum</i>                  | GH             | 252 | 0.004      | -    | (12)   |
| Ptero  | <i>Epomophorus gambianus gambianus</i> | GH             | 37  | 0.38       | 2    | (13)   |
| Ptero  | <i>Epomops franqueti</i>               | GH             | 27  | 0.37       | 2    | (13)   |
| Ptero  | <i>Epomops franqueti</i>               | GA, CG         | 11  | 0.07       | 2    | (14)   |
| Ptero  | <i>Epomops franqueti</i>               | GA, CG         | 805 | 0.04       | 2    | (15)   |
| Ptero  | <i>Epomops franqueti</i>               | CI, SL, LR, CG | 62  | 0.08       | 3    | (11)   |
| Ptero  | <i>Hypsignathus monstrosus</i>         | GH             | 16  | 0.44       | 1    | (13)   |
| Ptero  | <i>Hypsignathus monstrosus</i>         | GA, CG         | 17  | 0.24       | 1    | (14)   |
| Ptero  | <i>Hypsignathus monstrosus</i>         | GA, CG         | 125 | 0.07       | 1    | (15)   |
| Ptero  | <i>Hypsignathus monstrosus</i>         | CI, SL, LR, CG | 70  | 0.16       | 2    | (11)   |
| Ptero  | <i>Micropteropus pusillus</i>          | GA, CG         | 197 | 0.02       | 4    | (15)   |
| Ptero  | <i>Micropteropus sp.</i>               | CG             | 40  | 0.03       | 4    | (11)   |
| Ptero  | <i>Myonycteris torquata</i>            | GA, CG         | 58  | 0.07       | 3    | (14)   |
| Ptero  | <i>Myonycteris torquata</i>            | GA, CG         | 573 | 0.03       | 3    | (15)   |
| Ptero  | <i>Myonycteris torquata</i>            | CI, SL, LR, CG | 307 | 0.01       | 5    | (11)   |
| Ptero  | <i>Nanonycteris veldkampii</i>         | GH             | 4   | 0.25       | 3    | (13)   |
| Ptero  | <i>Rousettus aegyptiacus</i>           | GA, CG         | 307 | 0.08       | 1    | (15)   |
| Ptero  | <i>Rousettus aegyptiacus</i>           | CG             | 2   | 1.00       | 1    | (11)   |

185

186 **Supplementary Table 2. Details of bioclimatic and land use variables used to estimate**  
 187 **probability of EBOV host presence, *H.*** Nine most orthogonal (<75% correlation) bioclimatic  
 188 variables were chosen from (16). For analysis, all variables were reduced in latitudinal extent to 85°  
 189 N, 58° S and resampled to a 0.0416° grid cell size using a World Geodetic System 84 projection.  
 190 LULC is a categorical dataset where the most predominant land use-land cover type in each grid cell  
 191 is given within the following categories: Evergreen needle leaf forest; Evergreen broadleaf forest;  
 192 Deciduous needle leaf forest; Deciduous broadleaf forest; Mixed forest; Closed shrublands; Open  
 193 shrublands; Woody savannah; Grassland; Permanent wetlands; Cropland; Urban and built-up;  
 194 Cropland/natural vegetation mosaic; Snow and ice; Barren or sparsely vegetated; and Water bodies.  
 195

| No. | Variable Description                      | Original Spatial Extent | Original Spatial Resolution (cell size at equator) | Temporal Resolution | Source |
|-----|-------------------------------------------|-------------------------|----------------------------------------------------|---------------------|--------|
| 1   | BIO2 Mean Diurnal Temperature Range       | Global                  | 1km                                                | 2012                | (16)   |
| 2   | BIO5 Maximum Temperature of Warmest Month | Global                  | 1km                                                | 2012                | (16)   |
| 3   | BIO6 Minimum Temperature of Coldest Month | Global                  | 1km                                                | 2012                | (16)   |
| 4   | BIO7 Temperature Annual Range             | Global                  | 1km                                                | 2012                | (16)   |
| 5   | BIO10 Mean Temperature of Warmest Quarter | Global                  | 1km                                                | 2012                | (16)   |
| 6   | BIO11 Mean Temperature of Coldest Quarter | Global                  | 1km                                                | 2012                | (16)   |
| 7   | BIO12 Annual Precipitation                | Global                  | 1km                                                | 2012                | (16)   |
| 8   | BIO13 Precipitation of Wettest Month      | Global                  | 1km                                                | 2012                | (16)   |
| 9   | BIO14 Precipitation of Driest Month       | Global                  | 1km                                                | 2012                | (16)   |
| 10  | ALT Digital Elevation Model               | Global                  | 1km                                                | 2008                | (17)   |
| 11  | LULC Land Use-Land Cover                  | Global                  | 500m                                               | 2001-2012           | (18)   |

196

197 **Supplementary Table 3. Estimates of global daily walking distances,  $v\Delta t$ .** Estimates of daily  
 198 walking distances were collected from the literature per country. Daily step numbers were converted  
 199 to distance (km) using an average step length of 1.41m (19). As studies have suggested that daily  
 200 walking distance is stratified among income categories (20), countries were assigned to income bands  
 201 based on per capita Gross Domestic Product (GDP) (measured as Purchasing Power Parity from 2)  
 202 such that the poorest countries were given a value of 1 and the richest 4. A mean estimate of walking  
 203 distance was calculated for each band. Countries were then assigned a walking distance corresponding  
 204 to their GDP band. No estimates were found for band 3 (\$1600 - \$35000), so countries in this band  
 205 were given daily walking distances halfway between bands 2 and 4.

206

| Country                  | Steps | Distance (km) | GDP band | GDP PPP Per capita (lower bound) \$ | GDP PPP Per capita (upper bound) \$ | Mean km Per GDP Band | Source |
|--------------------------|-------|---------------|----------|-------------------------------------|-------------------------------------|----------------------|--------|
| Niger                    | -     | 7             | 1        | 0                                   | 1600                                | 9.6                  | (21)   |
| Central African Republic | -     | 8             | 1        | 0                                   | 1600                                | 9.6                  | (21)   |
| Chad                     | -     | 15            | 1        | 0                                   | 1600                                | 9.6                  | (21)   |
| Mali                     | -     | 13.2          | 1        | 0                                   | 1600                                | 9.6                  | (21)   |
| Niger                    | -     | 4.8           | 1        | 0                                   | 1600                                | 9.6                  | (21)   |
| South Africa             | 12471 | 8.85          | 2        | 1600                                | 13000                               | 8.5                  | (22)   |
| Tanzania                 | -     | 8.3           | 2        | 1600                                | 13000                               | 8.5                  | (23)   |
| Australia                | 9695  | 6.88          | 4        | 35000                               | 128530                              | 5.6                  | (24)   |
| Japan                    | 7168  | 5.08          | 4        | 35000                               | 128530                              | 5.6                  | (24)   |
| Switzerland              | 9650  | 6.85          | 4        | 35000                               | 128530                              | 5.6                  | (24)   |
| United States            | 5117  | 3.63          | 4        | 35000                               | 128530                              | 5.6                  | (24)   |

207

208

209 **Supplementary Table 4. Collated epidemiological data on EBOV outbreaks.** Data on 19 locations  
 210 that have experienced EBOV outbreaks or importations and have data on either Case Fatality Rate  
 211 (CFR) (3, 25, 26, 27-31) or on Effective Reproductive Number change (5, 26, 27, 32-34) ( $R_e$  gradient  
 212 per week). The latter data was either taken directly from tables or text from within literature sources  
 213 or estimated (Spain, United Kingdom, Nigeria, United States) from descriptions of outbreak events  
 214 detailed in the sources. Child mortality data for the year of outbreak is taken from World Bank  
 215 Development Indicators (2)

216

| Location         | County | Year       | ln GDP per capita<br>for year | CFR      | $R_e$ gradient per week |
|------------------|--------|------------|-------------------------------|----------|-------------------------|
| United States    | Texas  | 2014       | 4.74                          | 0.3      | 0.5                     |
| Guinea           |        | 2014       | 3.09                          | 0.707    | 0.113636                |
| Sierra Leone     |        | 2014       | 3.31                          | 0.69     | 0.076923                |
| Liberia          |        | 2014       | 2.99                          | 0.723    | 0.04                    |
| Germany          |        | 2014       | 4.66                          | 0        |                         |
| Spain            | Madrid | 2014       | 4.53                          | 0        | 0.5                     |
| United Kingdom   | London | 2014       | 4.59                          | 0        | 3                       |
| Nigeria          |        | 2014       | 3.77                          | 0.666667 | 0.533333                |
| Mali             |        | 2014       | 3.24                          | 0.75     |                         |
| Congo, Dem. Rep. |        | 1976       | 2.72                          | 0.88     | 0.105                   |
| Gabon            |        | 1994       | 4.14                          | 0.61     |                         |
| Congo, Dem. Rep. |        | 1995       | 2.72                          | 0.81     |                         |
| Gabon            |        | Early-1996 | 4.17                          | 0.68     |                         |
| Gabon            |        | Late-1996  | 4.17                          | 0.75     |                         |
| Gabon            |        | 2001–2002  | 4.15                          | 0.82     |                         |
| Congo, Rep.      |        | 2001–2002  | 3.58                          | 0.76     |                         |
| Congo, Rep.      |        | Early-2003 | 3.6                           | 0.89     |                         |
| Congo, Rep.      |        | Late-2003  | 3.6                           | 0.83     |                         |
| Congo, Rep.      |        | 2005       | 3.65                          | 0.75     |                         |

217

218

219

220

221 **Supplementary Table 5. List of all 32 climate models used in analysis.** List of all models (36) used  
 222 to construct the host niche models with columns of name, origin and the ocean and atmosphere  
 223 resolutions of the model.

| Model Name     | Institute and Country of Origin | Ocean horizontal resolution (°lat x °lon) | Atmosphere horizontal resolution (°lat x °lon) |
|----------------|---------------------------------|-------------------------------------------|------------------------------------------------|
| ACCESS-1.0     | CSIRO-BOM, Australia            | 1.0×1.0                                   | 1.9×1.2                                        |
| ACCESS-1.3     | CSIRO-BOM, Australia            | 1.0×1.0                                   | 1.9×1.2                                        |
| CESM1-BGC      | NSF-DOE-NCAR, USA               | 1.1×0.6                                   | 1.2×0.9                                        |
| CESM1-CAM5     | NSF-DOE-NCAR, USA               | 1.1×0.6                                   | 1.2×0.9                                        |
| CanESM2        | CCCMA, Canada                   | 1.4×0.9                                   | 2.8×2.8                                        |
| CCSM4          | NCAR, USA                       | 1.1×0.6                                   | 1.2×0.9                                        |
| MRI-CGCM3      | MRI, Japan                      | 1.0×0.5                                   | 1.1×1.1                                        |
| GFDL-CM3       | NOAA, GFDL, USA                 | 1.0×1.0                                   | 2.5×2.0                                        |
| CanCM4         | CCCMA, Canada                   | 1.4×0.9                                   | 2.8×2.8                                        |
| IPSL-CM5A-LR   | IPSL, France                    | 2.0×1.9                                   | 3.7×1.9                                        |
| IPSL-CM5A-MR   | IPSL, France                    | 1.6×1.4                                   | 2.5×1.3                                        |
| IPSL-CM5B-LR   | IPSL, France                    | 2.0×1.9                                   | 3.7×1.9                                        |
| BCC-CSM1-1     | BCC, CMA, China                 | 1.0×1.0                                   | 2.8×2.8                                        |
| BCC-CSM1-1-M   | BCC, CMA, China                 | 1.0×1.0                                   | 1.1×1.1                                        |
| GISS-E2-H      | NASA/GISS, NY, USA              | 2.5×2.0                                   | 2.5×2.0                                        |
| GISS-E2-H-CC   | NASA/GISS, NY, USA              | 1.0×1.0                                   | 1.0×1.0                                        |
| GISS-E2-R      | NASA/GISS, NY, USA              | 2.5×2.0                                   | 2.5×2.0                                        |
| GISS-E2-R-CC   | NASA/GISS, NY, USA              | 1.0×1.0                                   | 1.0×1.0                                        |
| EC-EARTH       | EC-EARTH, Europe                | 1.0×0.8                                   | 1.1×1.1                                        |
| MIROC-ESM      | JAMSTEC, Japan                  | 1.4×0.9                                   | 2.8×2.8                                        |
| MIROC-ESM-CHEM | JAMSTEC, Japan                  | 1.4×0.9                                   | 2.8×2.8                                        |
| MPI-ESM-LR     | MPI-N, Germany                  | 1.5×1.5                                   | 1.9×1.9                                        |
| MPI-ESM-MR     | MPI-N, Germany                  | 0.4×0.4                                   | 1.9×1.9                                        |
| GFDL-ESM2G     | NOAA, GFDL, USA                 | 1.0×1.0                                   | 2.5×2.0                                        |
| GFDL-ESM2M     | NOAA, GFDL, USA                 | 1.0×1.0                                   | 2.5×2.0                                        |
| FGOALS-g2      | LASG, China                     | 2.8 x 2.8                                 | 0.5x1                                          |
| HadGEM2-AO     | NIMR-KMA, Korea                 | 1.0×1.0                                   | 1.9×1.2                                        |
| HadGEM2-CC     | MOHC, UK                        | 1.0×1.0                                   | 1.9×1.2                                        |
| HadGEM2-ES     | MOHC, UK                        | 1.0×1.0                                   | 1.9×1.2                                        |
| MIROC5         | JAMSTEC, Japan                  | 1.6×1.4                                   | 1.4×1.4                                        |
| CSIRO-Mk3-6-0  | CSIRO-QCCCE, Australia          | 1.9×0.9                                   | 1.9×1.9                                        |
| NorESM1-M      | NCC, Norway                     | 1.1×0.6                                   | 2.5×1.9                                        |

224

225



226 **Supplementary References**

- 227 1 Hutchinson, J. & Waser, P. M. Use, misuse and extensions of “ideal gas” models of  
228 animal encounter. *Biological Reviews* 3, 335-359 (2007).
- 229 2 World Bank. World Development Indicators. (World Bank, 2014).
- 230 3 Legrand, J., Grais, R. F., Boelle, P.-Y., Valleron, A.-J. & Flahault, A. Understanding  
231 the dynamics of Ebola epidemics. *Epidemiology and Infection* 135, 610-621 (2007).
- 232 4 Kiskowski, M. A. A three-scale network model for the early growth dynamics of 2014  
233 west Africa ebola epidemic. *PLoS currents* 6 (2014).
- 234 5 Althaus, C. L., Low, N., Musa, E. O., Shuaib, F. & Gsteiger, S. Ebola virus disease  
235 outbreak in Nigeria: transmission dynamics and rapid control. *Epidemics* 11, 80-84 (2015).
- 236 6 Nishiura, H. & Chowell, G. Early transmission dynamics of Ebola virus disease  
237 (EVD), West Africa, March to August 2014. *Eurosurveillance* 19, 20894, doi:10.2807/1560-  
238 7917.ES2014.19.36.20894 (2014).
- 239 7 Elvidge, C. D. et al. A global poverty map derived from satellite data. *Computers &*  
240 *Geosciences* 35, 1652-1660 (2009).
- 241 8 Global Biodiversity Information Facility. (<http://www.gbif.org/>, 2013).
- 242 9 Pigott, D. M. et al. Mapping the zoonotic niche of Ebola virus disease in Africa. *Elife*  
243 3, e04395 (2014).
- 244 10 Wilson, D. E. & Reeder, D. M. Vol. 1 (John Hopkins University Press, Baltimore,  
245 2005).
- 246 11 Weiß aus Karlsruhe, S. Identification and characterisation of emerging viruses in free-  
247 ranging bats from sub-Saharan Africa EngD Thesis thesis, Technical University of Berlin,  
248 (2013).
- 249 12 Hayman, D. T. S. et al. Long-Term Survival of an Urban Fruit Bat Seropositive for  
250 Ebola and Lagos Bat Viruses. *PloS one* 5, e11978 (2010).

- 251 13 Hayman, D. T. S. et al. Ebola virus antibodies in fruit bats, Ghana, West Africa.  
252 *Emerging infectious diseases* 18, 1207-1209, doi:10.3201/eid1807.111654 (2012).
- 253 14 Leroy, E. M. et al. Fruit bats as reservoirs of Ebola virus. *Nature* 438, 575-576,  
254 doi:10.1038/438575a (2005).
- 255 15 Pourrut, X. et al. Large serological survey showing cocirculation of Ebola and  
256 Marburg viruses in Gabonese bat populations, and a high seroprevalence of both viruses in  
257 *Rousettus aegyptiacus*. *BMC infectious diseases* 9, 159, doi:10.1186/1471-2334-9-159  
258 (2009).
- 259 16 Hijmans, R. J., Cameron, S. E., Parra, J. L., Jones, P. G. & Jarvis, A. Very high  
260 resolution interpolated climate surfaces for global land areas. *International Journal of*  
261 *Climatology* 25, 1965-1978 (2005).
- 262 17 Jarvis, A., Reuter, H. I., Nelson, A. & Guevara, E. (CGIAR-CSI SRTM 90m  
263 Database, 2008).
- 264 18 Friedl, M. A. et al. MODIS Collection 5 global land cover: Algorithm refinements  
265 and characterisation of new datasets. *Remote Sensing of the Environment* 114, 168-182  
266 (2010).
- 267 19 Barreira, T. V., Rowe, D. A. & Kang, M. Original Research Parameters of Walking  
268 and Jogging in Healthy Young Adults. *International Journal of Exercise Science* 3, 4-13  
269 (2010).
- 270 20 Hallal, P. C. et al. Global physical activity levels: surveillance progress, pitfalls, and  
271 prospects. *The Lancet* 380, 247-257 (2012).
- 272 21 Filmer, D. If You Build It, Will They Come? School Availability and School  
273 Enrollment in 21 Poor Countries. (The World Bank, 2004).

- 274 22 Cook, I., Alberts, M. & Lambert, E. V. Relationship between adiposity and  
275 pedometer-assessed ambulatory activity in adult, rural African women. *International Journal*  
276 *of Obesity* 32, 1327-1330 (2008).
- 277 23 Marlowe, F. *The Hadza: Hunter-gatherers of Tanzania*. (University of California  
278 Press, 2010).
- 279 24 BASSETT, D. R. J., WYATT, H. R., THOMPSON, H., PETERS, J. C. & HILL, J. O.  
280 Pedometer-Measured Physical Activity and Health Behaviors in U.S. Adults. *Medicine &*  
281 *Science in Sports & Exercise* 42, 1819-1825, doi:10.1249/MSS.0b013e3181dc2e54 (2010).
- 282 25 Chowell, G., Hengartner, N. W., Castillo-Chavez, C., Fenimore, P. W. & Hyman, J.  
283 M. The basic reproductive number of Ebola and the effects of public health measures: The  
284 cases of Congo and Uganda. *Journal of Theoretical Biology* 229, 119-126,  
285 doi:10.1016/j.jtbi.2004.03.006 (2004).
- 286 26 Althaus, C. L. Estimating the reproduction number of Ebola virus (EBOV) during the  
287 2014 outbreak in West Africa. *arXiv preprint arXiv:1408.3505* (2014).
- 288 27 Chowell, G. & Nishiura, H. Transmission dynamics and control of Ebola virus disease  
289 (EVD): a review. *BMC medicine* 12, 196 (2014).
- 290 28 Lefebvre, A. et al. Case fatality rates of Ebola virus diseases: a meta-analysis of  
291 World Health Organization data. *Médecine et maladies infectieuses* 44, 412-416 (2014).
- 292 29 Kucharski, A. J. & Edmunds, W. J. Case fatality rate for Ebola virus disease in west  
293 Africa. *The Lancet* 384, 1260 (2014).
- 294 30 Fasina, F. O. et al. Transmission dynamics and control of Ebola virus disease  
295 outbreak in Nigeria, July to September 2014. *Euro Surveill* 19, 20920 (2014).
- 296 31 Rouquet, P. et al. Wild animal mortality monitoring and human Ebola outbreaks,  
297 Gabon and Republic of Congo, 2001–2003. *Emerging infectious diseases* 11, 283 (2005).

- 298 32 Team, W. E. R. Ebola virus disease in West Africa—the first 9 months of the  
299 epidemic and forward projections. *N Engl J Med* 2014, 1481-1495 (2014).
- 300 33 Towers, S., Patterson-Lomba, O. & Castillo-Chavez, C. Temporal variations in the  
301 effective reproduction number of the 2014 West Africa Ebola outbreak. *PLoS currents* 6  
302 (2014).
- 303 34 Althaus, C. L. Estimating the reproduction number of Ebola virus (EBOV) during the  
304 2014 outbreak in West Africa. *PLoS currents* 6 (2014).
- 305 35 European Network for Earth Systems Modelling: CMIP5 Models and Grid Resolution  
306 (<https://portal.enes.org/data/enes-model-data/cmip5/resolution>, 2018).
- 307
- 308
